# Supplementary material
Source: Copernicus journal article supplement (doi:10.5194/hess-30-2741-2026)
Supplement: Supplementary file 1 [file hess-30-2741-2026-supplement.pdf]

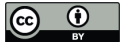

*Supplement of*

## **Integrating topographic continuity and lake recession dynamics for improved bathymetry mapping from DEMs**

**Fukun Tao et al.**

*Correspondence to:* Yao Li (liyao7@swu.edu.cn)

The copyright of individual parts of the supplement might differ from the article licence.

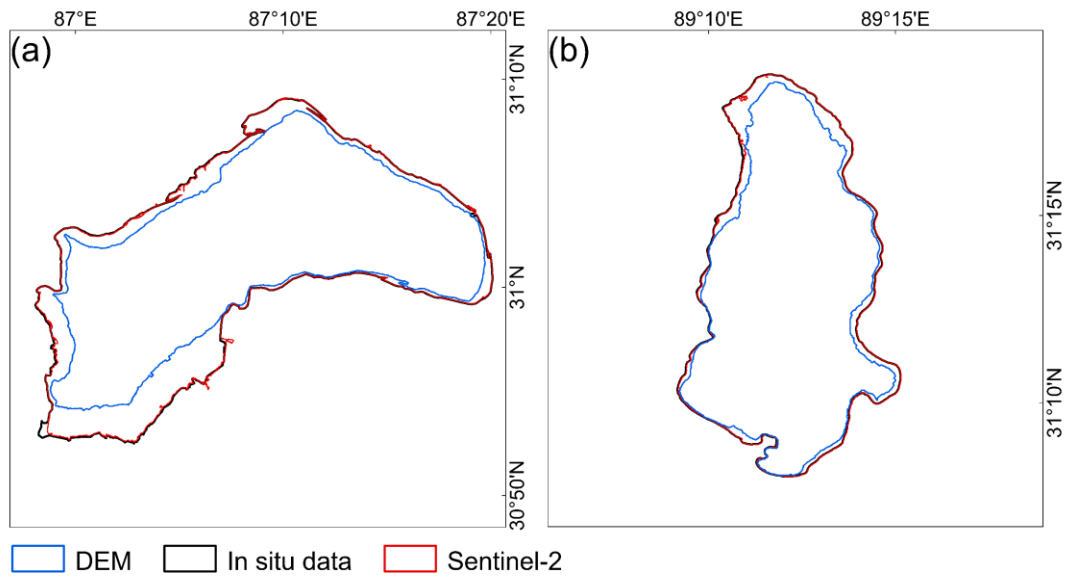

**Figure S1.** Comparison of lake boundaries derived from different data sources for (a) Angzi Co and (b) Guomang Co. Blue outlines indicate lake extents from DEM data, black outlines represent extents from the in situ dataset, and red outlines represent extents extracted from Sentinel-2 imagery. The boundaries derived from in situ measurements and Sentinel-2 imagery show strong agreement.

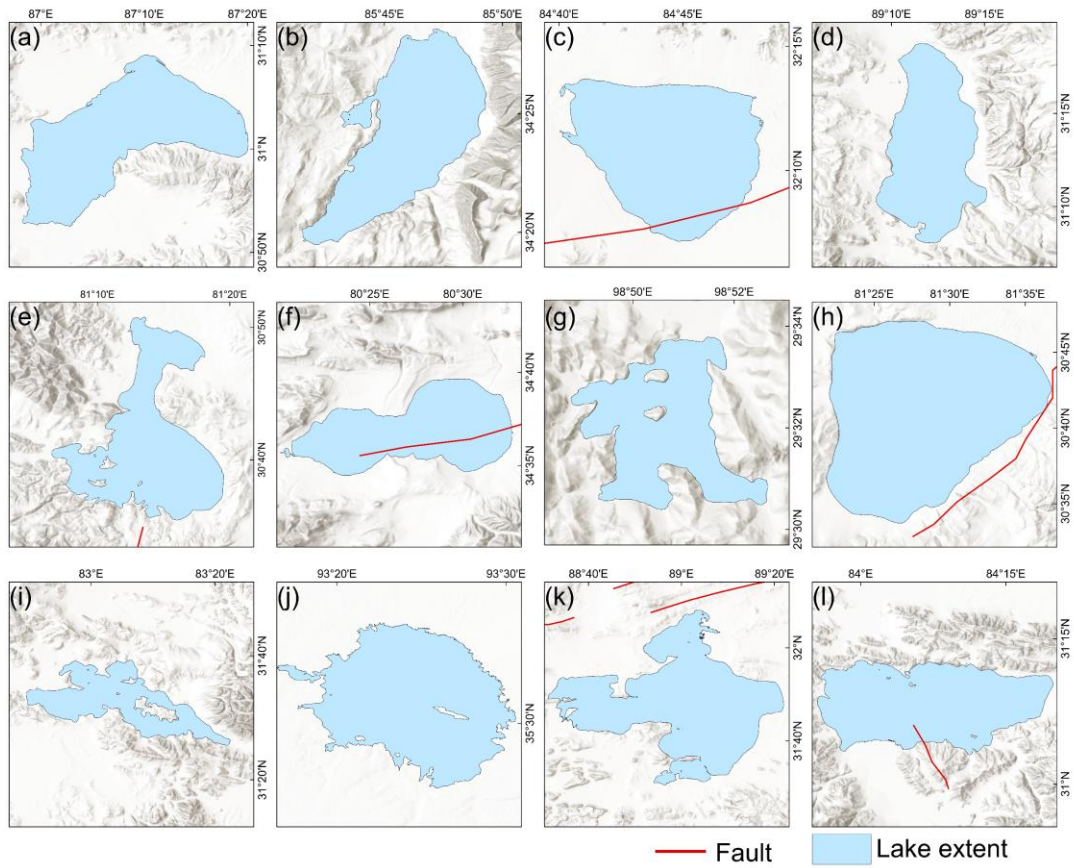

**Figure S2.** Spatial relationships between major faults (red lines) and the long-axis orientations of the 12 validation lakes: (a) Angzi Co, (b) Buruo Co, (c) Dong Co, (d) Guomang Co, (e) Laang Co, (f) Longmu Co, (g) Mang Co, (h) Mapang Yongco, (i) Ngangla Rinco, (j) Salt Lake, (k) Siling Co, and (l) Taro Co. Fault data were derived from Gao et al. (2023).

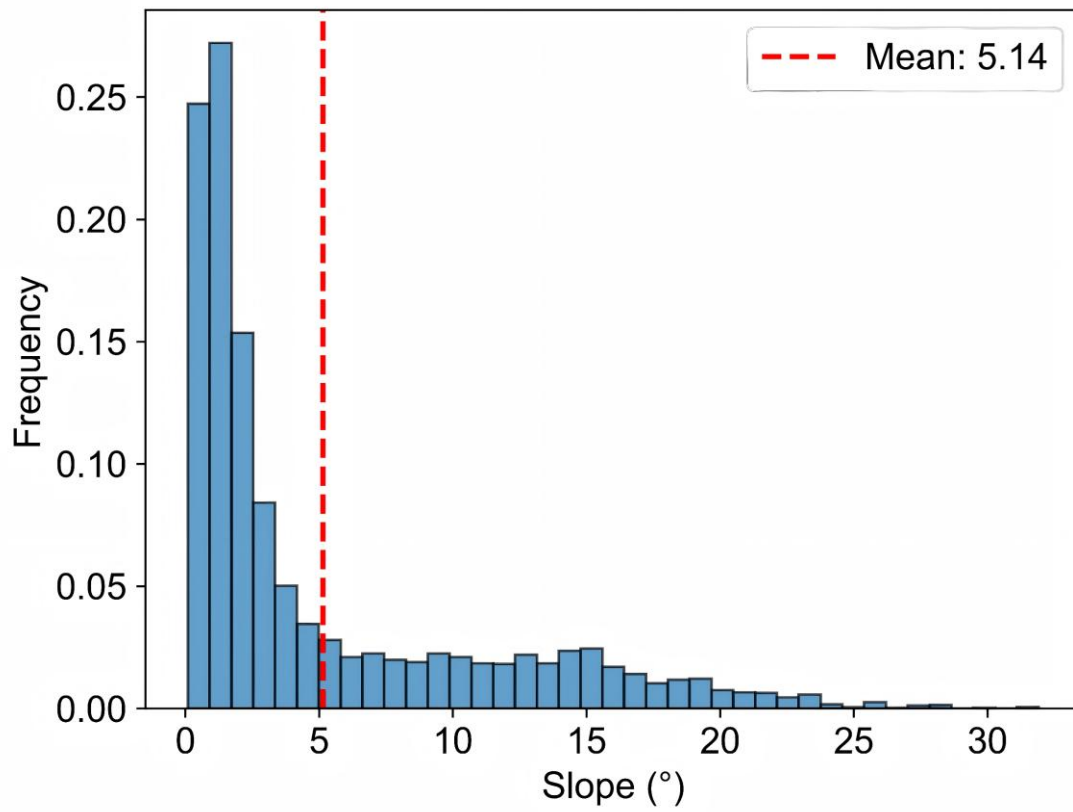

**Figure S3.** Histogram of shoreline slopes for 4,000 Tibetan Plateau lakes from the HydroLAKES database.

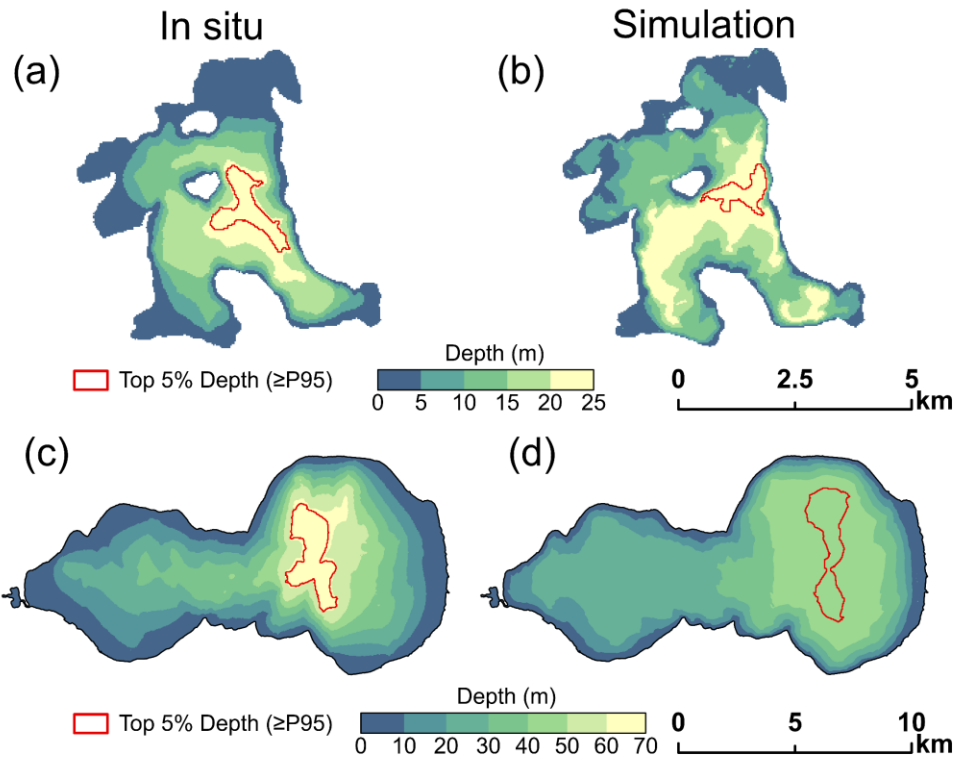

**Figure S4.** Bathymetric maps derived from the in situ dataset and from our simulations: (a) In situ bathymetry of Mang Co, (b) Simulated bathymetry of Mang Co, (c) In situ bathymetry of Longmu Co, and (d) Simulated bathymetry of Longmu Co.

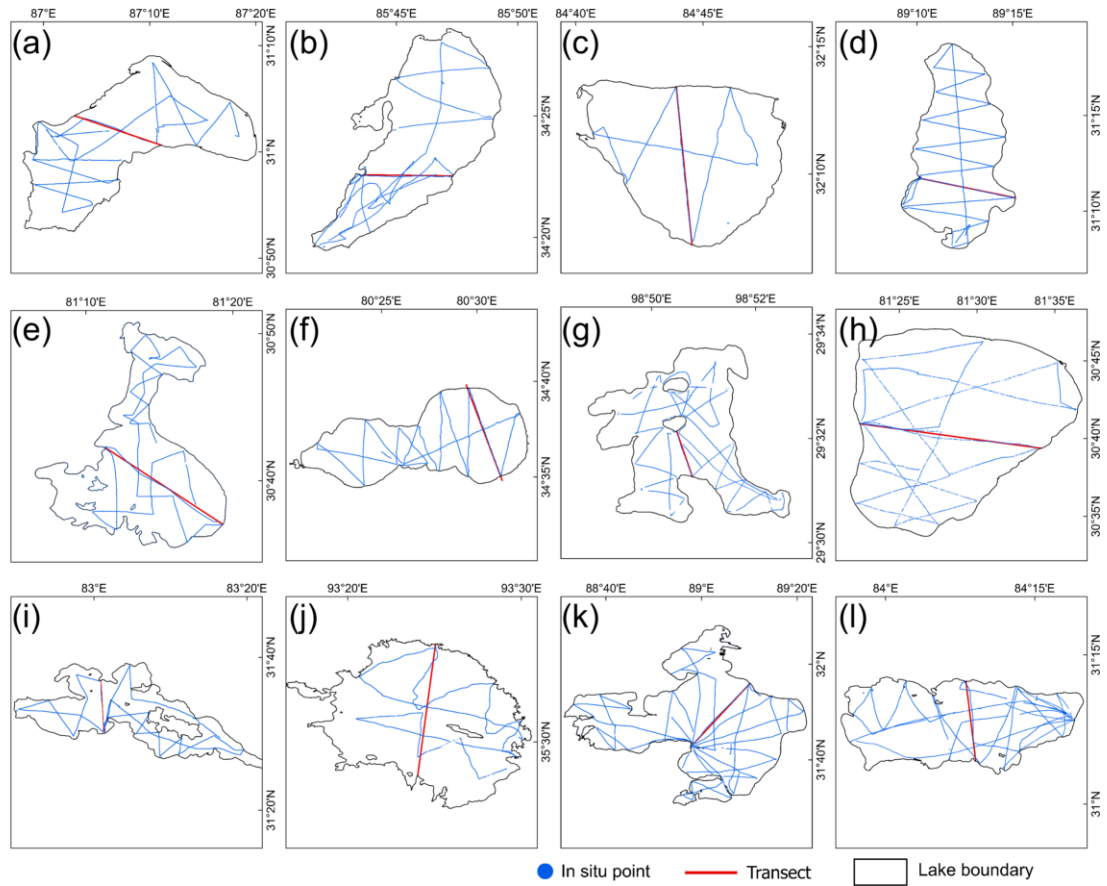

**Figure S5.** Footprints of the bathymetric survey tracks for (a) Angzi Co, (b) Buruo Co, (c) Dong Co, (d) Guomang Co, (e) Laang Co, (f) Longmu Co, (g) Mang Co, (h) Mapang Yongco, (i) Ngangla Rinco, (j) Salt Lake, (k) Siling Co, and (l) Taro Co. The red line denotes the transect used for validation in **Figure 8**.

**Table S1.** Comparison of lake maximum depth and water storage between in situ measurements and simulated bathymetric maps derived from ALOS PLASAR.

| Lake name     | Maximum depth (m) |           |         | Water storage (km <sup>3</sup> ) |           |         |
|---------------|-------------------|-----------|---------|----------------------------------|-----------|---------|
|               | In situ           | Simulated | PE*     | In situ                          | Simulated | PE      |
| Angzi Co      | 18.83             | 27.47     | 45.91%  | 4.81                             | 6.67      | 38.82%  |
| Burao Co      | 100.55            | 73.52     | -26.88% | 3.86                             | 3.66      | -5.20%  |
| Dong Co       | 3.99              | 21.88     | 448.35% | 0.22                             | 1.19      | 441.62% |
| Guomang Co    | 39.49             | 33.60     | -14.92% | 1.76                             | 2.33      | 32.54%  |
| Laang Co      | 49.20             | 56.80     | 15.45%  | 5.53                             | 6.44      | 16.44%  |
| Longmu Co     | 67.52             | 49.96     | -26.00% | 2.70                             | 2.98      | 10.49%  |
| Mang Co       | 22.28             | 29.35     | 31.73%  | 0.18                             | 0.28      | 53.04%  |
| Mapang Yongco | 79.45             | 106.20    | 33.68%  | 17.20                            | 25.25     | 46.81%  |
| Ngangla Rinco | 74.94             | 57.18     | -23.70% | 9.09                             | 15.00     | 64.93%  |
| Salt Lake     | 32.78             | 43.86     | 33.81%  | 2.76                             | 3.91      | 42.08%  |
| Siling Co     | 52.50             | 32.57     | -37.96% | 52.72                            | 30.70     | -41.76% |
| Taro Co       | 130.95            | 64.50     | -50.74% | 28.02                            | 12.26     | -56.25% |

\*PE represents percentage error.

**Table S2.** Comparison of lake maximum depth and water storage between in situ measurement and simulated bathymetric maps derived from the MERIT DEM.

| Lake name     | Maximum depth (m) |           | PE*     | Water storage (km <sup>3</sup> ) |           | PE      |
|---------------|-------------------|-----------|---------|----------------------------------|-----------|---------|
|               | In situ           | Simulated |         | In situ                          | Simulated |         |
| Angzi Co      | 18.83             | 19.65     | 4.35%   | 4.81                             | 4.97      | 3.40%   |
| Buruo Co      | 100.55            | 56.76     | -43.55% | 3.86                             | 3.12      | -19.23% |
| Dong Co       | 3.99              | 11.35     | 184.62% | 0.22                             | 0.71      | 223.27% |
| Guomang Co    | 39.49             | 25.81     | -34.64% | 1.76                             | 1.53      | -13.25% |
| Laang Co      | 49.20             | 53.09     | 7.91%   | 5.53                             | 4.92      | -11.14% |
| Longmu Co     | 67.52             | 39.30     | -41.80% | 2.70                             | 2.33      | -13.62% |
| Mang Co       | 22.28             | 20.99     | -5.79%  | 0.18                             | 0.12      | -33.22% |
| Mapang Yongco | 79.45             | 90.97     | 14.51%  | 17.2                             | 22.38     | 30.14%  |
| Ngangla Rinco | 74.94             | 32.68     | -56.39% | 9.09                             | 8.31      | -8.56%  |
| Salt Lake     | 32.78             | 32.36     | -1.29%  | 2.76                             | 3.57      | 29.61%  |
| Siling Co     | 52.50             | 29.12     | -44.53% | 52.72                            | 38.36     | -27.23% |
| Taro Co       | 130.95            | 88.22     | -32.63% | 28.02                            | 20.10     | -28.27% |

\*PE represents percentage error.

**Table S3.** Mean absolute percentage error results used to generate **Figure 9**.

| Lake name     | Mean absolute percentage error |         |         |
|---------------|--------------------------------|---------|---------|
|               | ALOS                           | MERIT   | NASA    |
| Angzi Co      | 35.70%                         | 21.24%  | 22.13%  |
| Buruo Co      | 33.38%                         | 38.99%  | 58.52%  |
| Dong Co       | 291.39%                        | 48.58%  | 136.51% |
| Guomang Co    | 33.09%                         | 29.30%  | 35.78%  |
| Laang Co      | 31.75%                         | 36.15%  | 45.29%  |
| Longmu Co     | 32.22%                         | 32.62%  | 34.49%  |
| Mang Co       | 79.14%                         | 61.31%  | 75.92%  |
| Mapang Yongco | 90.01%                         | 87.99%  | 61.86%  |
| Ngangla Rinco | 162.68%                        | 103.62% | 98.15%  |
| Salt Lake     | 18.22%                         | 9.49%   | 11.61%  |
| Siling Co     | 44.36%                         | 22.28%  | 38.36%  |
| Taro Co       | 65.19%                         | 49.15%  | 52.92%  |

**Table S4.** Comparison of simulation results across the 12 sample lakes using input data at different spatial resolutions.

| Lake name     | PE* of maximum depth |         |         | PE of water storage |        |         |
|---------------|----------------------|---------|---------|---------------------|--------|---------|
|               | ALOS                 | NASA    | MERIT   | ALOS                | NASA   | MERIT   |
| Angzi Co      | 45.91%               | -26.46% | 4.35%   | 38.82%              | -3.17% | 3.40%   |
| Buruo Co      | -26.88%              | -28.52% | -43.55% | -5.20%              | 5.75%  | -19.23% |
| Dong Co       | 448.35%              | 59.37%  | 184.62% | 441.62%             | 94.84% | 223.27% |
| Guomang Co    | -14.92%              | -6.73%  | -34.64% | 32.54%              | 35.14% | -13.25% |
| Laang Co      | 15.45%               | 15.94%  | 7.91%   | 16.44%              | 15.81% | -11.14% |
| Longmu Co     | -26.00%              | -20.84% | -41.80% | 10.49%              | 14.12% | -13.62% |
| Mang Co       | 31.73%               | 2.44%   | -5.79%  | 53.04%              | 16.29% | -33.22% |
| Mapang Yongco | 33.68%               | 24.82%  | 14.51%  | 46.81%              | 55.22% | 30.14%  |
| Ngangla Rinco | -23.70%              | -52.37% | -56.39% | 64.93%              | 5.30%  | -8.56%  |
| Salt Lake     | 33.81%               | -8.53%  | -1.29%  | 42.08%              | 29.92% | 29.61%  |
| Siling Co     | -37.96%              | 0.96%   | -44.53% | -41.76%             | 2.54%  | -27.23% |
| Taro Co       | -50.74%              | -24.09% | -32.63% | -56.25%             | -3.59% | -28.27% |

\*PE represents percentage error.

## References

Gao, Z.: Seismotectonic map and seismic hazard zonation map of Pan-Third Pole region (1960–2021), National Tibetan Plateau / Third Pole Environment Data Center, <https://doi.org/10.11888/SolidEar.tpsc.300783>, 2023.
